# Supplementary material for: Lactiplantibacillus plantarum DSM20174 Attenuates the Progression of Non-Alcoholic Fatty Liver Disease by Modulating Gut Microbiota, Improving Metabolic Risk Factors, and Attenuating Adipose Inflammation
Source: MDPI journal article supplement (doi:10.3390/nu14245212), 2022-12-07
Supplement: s1 [file s1]

**Table S1:** Composition of the 2014 Teckland global 14% protein rodent maintenance diet (Teklad Diet, Envigo).

| <b>MACRONUTRIENTS</b>          | <b>%</b> |
|--------------------------------|----------|
| <b>Crude protein</b>           | 14.3     |
| <b>Fat</b>                     | 4        |
| <b>Carbohydrate</b>            | 48       |
| <b>Crude fiber</b>             | 4.1      |
| <b>Neutral detergent fiber</b> | 18       |
| <b>Ash</b>                     | 4.7      |
| <b>Calories from fat</b>       | 13       |

Information collected from Envigo.

**Table S2:** Composition of the High fat diet rich in lard (Teklad Diet TD.06414, Envigo).

| <b>FORMULA</b>                    | <b>g/Kg</b> |
|-----------------------------------|-------------|
| <b>Casein</b>                     | 265         |
| <b>L-Cystine</b>                  | 4           |
| <b>Maltodextrin</b>               | 160         |
| <b>Sucrose</b>                    | 90          |
| <b>Lard</b>                       | 310         |
| <b>Soybean oil</b>                | 30          |
| <b>Cellulose</b>                  | 65.5        |
| <b>Mineral mix</b>                | 48          |
| <b>Calcium phosphate, dibasic</b> | 3.4         |
| <b>Vitamin mix</b>                | 21          |
| <b>Choline bitartrate</b>         | 3           |
| <b>Calories from fat</b>          | 60%         |

Information collected from Envigo.
